# Supplementary material
Source: publisher figshare collection journal article supplement (https://geolsoc.figshare.com/articles/dataset/_/3454301)
Supplement: Supplementary file 1 [file 1]

**Electronic Supplementary Table:  $^{40}\text{Ar}/^{39}\text{Ar}$  analytical data for supergene alunite and Mn-oxide samples. IA: integrated age, PA: plateau age, IIA: inverse isochron age. Data in italics were excluded from isochron analysis. Age uncertainties are presented at  $2\sigma$  levels.**

| Step                                                  | Laser Pwr | $^{36}\text{Ar}/^{39}\text{Ar}$ | $^{37}\text{Ar}/^{39}\text{Ar}$ | $^{38}\text{Ar}/^{39}\text{Ar}$ | $^{40}\text{Ar}/^{39}\text{Ar}$ | Mol $^{39}\text{Ar}$ | % $^{40}\text{Ar}^*$ | Age (Ma)    | $\pm (2\sigma)$ |
|-------------------------------------------------------|-----------|---------------------------------|---------------------------------|---------------------------------|---------------------------------|----------------------|----------------------|-------------|-----------------|
| <b>Alunite samples</b>                                |           |                                 |                                 |                                 |                                 |                      |                      |             |                 |
| <b>Sample DCA-90</b>                                  |           |                                 |                                 |                                 |                                 |                      |                      |             |                 |
| A                                                     | 1         | 6.235                           | 0.031                           | 0.045                           | 24.404                          | 0.050                | 1.300                | 56.4        | 17.5            |
| B                                                     | 2         | 0.909                           | 0.013                           | 0.046                           | 9.911                           | 0.366                | 3.600                | 23.1        | 2.6             |
| C                                                     | 2.5       | 0.304                           | 0.009                           | 0.047                           | 8.565                           | 0.491                | 8.700                | 20.0        | 0.9             |
| D                                                     | 3         | 0.273                           | 0.008                           | 0.047                           | 9.118                           | 0.772                | 10.100               | 21.3        | 0.8             |
| E                                                     | 3.5       | 0.207                           | 0.011                           | 0.045                           | 8.829                           | 0.670                | 12.600               | 20.6        | 0.6             |
| F                                                     | 4         | 0.115                           | 0.008                           | 0.043                           | 8.795                           | 0.434                | 20.500               | 20.5        | 0.5             |
| IA = $28.0 \pm 0.3$ Ma; J = $0.0012971 \pm 0.0000068$ |           |                                 |                                 |                                 |                                 |                      |                      |             |                 |
| PA = $20.6 \pm 1.0$ Ma (100% released gas)            |           |                                 |                                 |                                 |                                 |                      |                      |             |                 |
| IIA = $19.8 \pm 1.0$ Ma, n = 6, MSWD = 0.55           |           |                                 |                                 |                                 |                                 |                      |                      |             |                 |
| <b>Sample DCA-92</b>                                  |           |                                 |                                 |                                 |                                 |                      |                      |             |                 |
| A                                                     | 1         | 5.149                           | 0.097                           | 0.128                           | 35.789                          | 0.016                | 2.300                | 82.5        | 21.6            |
| B                                                     | 2         | 1.376                           | 0.013                           | 0.039                           | 12.431                          | 0.273                | 3.000                | 29.1        | 3.9             |
| C                                                     | 2.5       | 0.280                           | 0.012                           | 0.043                           | 8.925                           | 0.518                | 9.700                | 20.9        | 0.9             |
| D                                                     | 3         | 0.149                           | 0.011                           | 0.042                           | 8.612                           | 0.646                | 16.300               | 20.2        | 0.5             |
| E                                                     | 3.5       | 0.147                           | 0.011                           | 0.043                           | 8.386                           | 0.841                | 16.200               | 19.7        | 0.5             |
| F                                                     | 4         | 0.084                           | 0.010                           | 0.044                           | 8.302                           | 1.025                | 25.100               | 19.5        | 0.3             |
| G                                                     | 4.5       | 0.104                           | 0.012                           | 0.045                           | 8.365                           | 0.737                | 21.400               | 19.6        | 0.3             |
| H                                                     | 5         | <i>0.087</i>                    | <i>0.012</i>                    | <i>0.045</i>                    | <i>9.086</i>                    | <i>0.185</i>         | <i>26.000</i>        | <i>21.3</i> | <i>0.3</i>      |
| IA = $20.8 \pm 0.7$ Ma; J = $0.001305 \pm 0.0000068$  |           |                                 |                                 |                                 |                                 |                      |                      |             |                 |
| PA = $19.7 \pm 0.5$ Ma (89% released gas)             |           |                                 |                                 |                                 |                                 |                      |                      |             |                 |
| IIA = $18.7 \pm 0.6$ Ma, n = 7, MSWD = 0.31           |           |                                 |                                 |                                 |                                 |                      |                      |             |                 |
| <b>Sample DCA-94</b>                                  |           |                                 |                                 |                                 |                                 |                      |                      |             |                 |
| A                                                     | 1         | 5.088                           | 0.113                           | 0.056                           | 17.728                          | 0.033                | 1.200                | 40.3        | 14.6            |
| B                                                     | 2         | 1.255                           | 0.021                           | 0.034                           | 6.942                           | 0.216                | 1.800                | 15.9        | 3.5             |
| C                                                     | 2.5       | 0.226                           | 0.013                           | 0.042                           | 8.437                           | 0.384                | 11.200               | 19.3        | 0.6             |
| D                                                     | 3         | 0.085                           | 0.007                           | 0.043                           | 8.798                           | 0.509                | 25.800               | 20.1        | 0.3             |
| E                                                     | 3.5       | 0.060                           | 0.010                           | 0.041                           | 8.834                           | 0.556                | 33.200               | 20.2        | 0.2             |
| F                                                     | 4         | 0.124                           | 0.012                           | 0.042                           | 8.917                           | 0.534                | 19.600               | 20.4        | 0.4             |
| G                                                     | 4.5       | 0.073                           | 0.010                           | 0.048                           | 8.702                           | 0.408                | 28.700               | 19.9        | 0.3             |
| H                                                     | 5         | 0.067                           | 0.012                           | 0.043                           | 8.867                           | 0.378                | 30.900               | 20.3        | 0.2             |
| I                                                     | 5.5       | 0.079                           | 0.016                           | 0.043                           | 8.797                           | 0.326                | 27.400               | 20.1        | 0.4             |
| J                                                     | 6         | <i>0.034</i>                    | <i>0.009</i>                    | <i>0.044</i>                    | <i>9.069</i>                    | <i>0.311</i>         | <i>47.600</i>        | <i>20.7</i> | <i>0.2</i>      |
| K                                                     | 6.5       | <i>0.023</i>                    | <i>0.008</i>                    | <i>0.044</i>                    | <i>9.682</i>                    | <i>0.368</i>         | <i>59.100</i>        | <i>22.1</i> | <i>0.1</i>      |
| IA = $20.2 \pm 0.5$ Ma; J = $0.0012709 \pm 0.0000066$ |           |                                 |                                 |                                 |                                 |                      |                      |             |                 |
| PA = $20.3 \pm 0.4$ Ma (91% released gas)             |           |                                 |                                 |                                 |                                 |                      |                      |             |                 |
| IIA = $20.2 \pm 0.4$ Ma, n = 9, MSWD = 0.91           |           |                                 |                                 |                                 |                                 |                      |                      |             |                 |
| <b>Sample DCM-651B</b>                                |           |                                 |                                 |                                 |                                 |                      |                      |             |                 |
| A                                                     | 1         | 7.754                           | 0.037                           | 0.078                           | 33.403                          | 0.031                | 1.400                | 70.3        | 21.5            |
| B                                                     | 1.5       | 2.504                           | 0.016                           | 0.041                           | 17.178                          | 0.097                | 2.300                | 36.5        | 6.6             |
| C                                                     | 2         | 5.272                           | 0.009                           | 0.074                           | 28.675                          | 0.182                | 1.800                | 60.5        | 13.7            |
| D                                                     | 2.5       | 2.105                           | 0.003                           | 0.056                           | 17.346                          | 0.299                | 2.700                | 36.8        | 5.5             |
| E                                                     | 3         | 0.865                           | 0.002                           | 0.045                           | 12.179                          | 0.332                | 4.500                | 25.9        | 2.2             |
| F                                                     | 3.5       | 0.505                           | 0.004                           | 0.046                           | 10.660                          | 0.295                | 6.700                | 22.7        | 1.3             |

|   |     |       |       |       |        |       |        |      |     |
|---|-----|-------|-------|-------|--------|-------|--------|------|-----|
| G | 4   | 0.383 | 0.001 | 0.048 | 10.505 | 0.307 | 8.500  | 22.4 | 1.0 |
| H | 4.5 | 0.363 | 0.001 | 0.042 | 10.110 | 0.349 | 8.600  | 21.6 | 1.0 |
| I | 5   | 0.272 | 0.002 | 0.046 | 9.971  | 0.300 | 11.000 | 21.3 | 0.7 |
| J | 5.5 | 0.224 | 0.001 | 0.047 | 9.794  | 0.387 | 12.900 | 20.9 | 0.6 |
| K | 6   | 0.183 | 0.003 | 0.046 | 9.694  | 0.357 | 15.200 | 20.7 | 0.5 |

IA =  $27 \pm 2$  Ma; J =  $0.0011862 \pm 0.0000062$

PA =  $21.2 \pm 0.9$  Ma (79% released gas)

IIA =  $19.2 \pm 1.0$  Ma, n = 11, MSWD = 0.063

#### Sample DCM-449

|   |     |       |        |       |        |       |        |      |     |
|---|-----|-------|--------|-------|--------|-------|--------|------|-----|
| A | 1   | 1.713 | 0.007  | 0.037 | 14.102 | 0.016 | 2.700  | 31.7 | 5.8 |
| B | 2   | 0.071 | 0.001  | 0.044 | 11.580 | 0.249 | 35.500 | 26.0 | 0.3 |
| C | 2.5 | 0.026 | 0.000  | 0.045 | 11.467 | 0.363 | 60.300 | 25.8 | 0.1 |
| D | 3   | 0.013 | -0.001 | 0.046 | 11.390 | 0.439 | 74.500 | 25.6 | 0.1 |
| E | 3.5 | 0.008 | 0.001  | 0.045 | 11.428 | 0.418 | 83.100 | 25.7 | 0.1 |
| F | 4   | 0.012 | 0.002  | 0.045 | 11.436 | 0.179 | 75.700 | 25.7 | 0.1 |
| G | 4.5 | 0.006 | 0.016  | 0.047 | 11.452 | 0.160 | 86.900 | 25.8 | 0.1 |
| H | 5   | 0.008 | 0.000  | 0.044 | 11.506 | 0.062 | 82.600 | 25.9 | 0.1 |

IA =  $25.8 \pm 0.3$  Ma; J =  $0.0012528 \pm 0.0000065$

PA =  $25.7 \pm 0.3$  Ma (100% released gas)

IIA =  $25.7 \pm 0.3$  Ma, n = 8, MSWD = 0.63

#### Sample DCM-448A

|   |     |       |       |       |        |       |        |      |     |
|---|-----|-------|-------|-------|--------|-------|--------|------|-----|
| A | 1.5 | 2.040 | 0.035 | 0.056 | 27.207 | 0.160 | 4.300  | 29.1 | 0.9 |
| B | 2   | 0.188 | 0.018 | 0.058 | 23.820 | 0.158 | 30.000 | 25.5 | 0.2 |
| C | 2.5 | 0.202 | 0.004 | 0.049 | 24.127 | 0.216 | 28.800 | 25.8 | 0.2 |
| D | 3   | 0.235 | 0.020 | 0.048 | 23.914 | 0.085 | 25.600 | 25.6 | 0.2 |
| E | 3.5 | 0.272 | 0.062 | 0.047 | 23.758 | 0.049 | 22.800 | 25.4 | 0.3 |

IA =  $26.5 \pm 0.5$  Ma; J =  $0.0005965 \pm 0.0000035$

PA =  $25.6 \pm 0.4$  Ma (76% released gas)

IIA =  $25.2 \pm 0.4$  Ma, n = 5, MSWD = 0.8

#### Sample DCA-24C1

|   |     |       |       |       |        |       |        |      |     |
|---|-----|-------|-------|-------|--------|-------|--------|------|-----|
| A | 1   | 8.922 | 0.118 | 0.120 | 46.367 | 0.043 | 1.700  | 90.5 | 7.2 |
| B | 1.5 | 2.222 | 0.009 | 0.074 | 12.077 | 0.085 | 1.800  | 24.0 | 1.8 |
| C | 2   | 0.912 | 0.002 | 0.044 | 12.982 | 0.149 | 4.600  | 25.8 | 0.9 |
| D | 2.5 | 0.353 | 0.006 | 0.048 | 13.609 | 0.265 | 11.500 | 27.0 | 0.4 |
| E | 3   | 0.166 | 0.003 | 0.050 | 13.744 | 0.350 | 21.900 | 27.3 | 0.1 |
| F | 3.5 | 0.112 | 0.006 | 0.051 | 13.793 | 0.428 | 29.400 | 27.4 | 0.2 |
| G | 4   | 0.074 | 0.006 | 0.049 | 13.797 | 0.512 | 38.800 | 27.4 | 0.1 |
| H | 4.5 | 0.057 | 0.008 | 0.048 | 13.793 | 0.582 | 44.900 | 27.4 | 0.1 |
| I | 5   | 0.047 | 0.008 | 0.049 | 13.714 | 0.616 | 49.800 | 27.2 | 0.1 |
| J | 5.5 | 0.038 | 0.009 | 0.048 | 13.831 | 0.587 | 55.200 | 27.5 | 0.1 |

IA =  $28.8 \pm 0.3$  Ma; J =  $0.0011065 \pm 0.0000051$

PA =  $27.2 \pm 0.3$  Ma (99% released gas)

IIA =  $27.4 \pm 0.3$  Ma, n = 9, MSWD = 0.9

#### Sample DCA-28A

|   |     |       |       |        |        |       |        |      |     |
|---|-----|-------|-------|--------|--------|-------|--------|------|-----|
| A | 0.5 | 3.641 | 0.522 | -0.061 | 13.663 | 0.001 | 1.300  | 12.9 | 3.5 |
| B | 1   | 2.598 | 0.121 | 0.086  | 17.577 | 0.008 | 2.200  | 16.5 | 1.4 |
| C | 1.5 | 1.010 | 0.057 | 0.039  | 28.785 | 0.016 | 8.800  | 27.0 | 0.6 |
| D | 2   | 0.393 | 0.034 | 0.049  | 28.689 | 0.033 | 19.800 | 26.9 | 0.4 |
| E | 2.5 | 0.133 | 0.017 | 0.055  | 28.915 | 0.074 | 42.300 | 27.1 | 0.1 |
| F | 3   | 0.078 | 0.016 | 0.048  | 29.170 | 0.095 | 55.800 | 27.4 | 0.1 |
| G | 3.5 | 0.052 | 0.011 | 0.053  | 29.172 | 0.119 | 65.400 | 27.4 | 0.1 |

|   |     |       |       |       |        |       |        |      |     |
|---|-----|-------|-------|-------|--------|-------|--------|------|-----|
| H | 4   | 0.057 | 0.014 | 0.050 | 29.191 | 0.129 | 63.300 | 27.4 | 0.1 |
| I | 4.5 | 0.053 | 0.013 | 0.051 | 29.069 | 0.194 | 64.900 | 27.3 | 0.1 |
| K | 5   | 0.036 | 0.009 | 0.052 | 29.134 | 0.187 | 73.400 | 27.3 | 0.1 |
| L | 5.2 | 0.027 | 0.008 | 0.050 | 29.022 | 0.183 | 78.300 | 27.2 | 0.1 |
| M | 5.5 | 0.038 | 0.010 | 0.050 | 29.143 | 0.201 | 72.300 | 27.3 | 0.1 |

IA =  $27.2 \pm 0.3$  Ma; J =  $0.0005227 \pm 0.0000031$

PA =  $27.3 \pm 0.3$  Ma (99% released gas)

IIA =  $27.35 \pm 0.34$  Ma, n = 10, MSWD = 0.5

#### Sample DCM-651C

|   |     |       |       |       |        |       |        |      |     |
|---|-----|-------|-------|-------|--------|-------|--------|------|-----|
| A | 1   | 8.245 | 0.005 | 0.095 | 27.541 | 0.056 | 1.100  | 50.3 | 9.1 |
| B | 2   | 1.822 | 0.005 | 0.052 | 11.573 | 0.100 | 2.100  | 21.3 | 1.1 |
| C | 2.5 | 0.568 | 0.003 | 0.042 | 8.454  | 0.155 | 4.800  | 15.6 | 0.4 |
| D | 3   | 0.265 | 0.001 | 0.049 | 8.541  | 0.210 | 9.800  | 15.7 | 0.3 |
| E | 3.5 | 0.173 | 0.001 | 0.047 | 8.621  | 0.242 | 14.400 | 15.9 | 0.3 |
| F | 4   | 0.148 | 0.001 | 0.045 | 8.919  | 0.256 | 16.900 | 16.4 | 0.2 |
| G | 4.5 | 0.160 | 0.000 | 0.048 | 8.960  | 0.276 | 15.900 | 16.5 | 0.2 |
| H | 5   | 0.157 | 0.001 | 0.047 | 8.832  | 0.371 | 16.000 | 16.3 | 0.1 |
| I | 5.2 | 0.155 | 0.002 | 0.047 | 8.760  | 0.386 | 16.100 | 16.1 | 0.1 |
| J | 5.4 | 0.118 | 0.001 | 0.046 | 8.943  | 0.384 | 20.400 | 16.5 | 0.1 |

IA =  $17.2 \pm 0.5$  Ma; J =  $0.0010238 \pm 0.0000054$

PA =  $16.3 \pm 0.3$  Ma (94% released gas)

IIA =  $16.66 \pm 0.36$  Ma, n = 8, MSWD = 1.1

#### Sample DCM-731C

|   |     |       |       |       |       |       |        |      |     |
|---|-----|-------|-------|-------|-------|-------|--------|------|-----|
| A | 1   | 1.666 | 0.223 | 0.063 | 9.656 | 0.016 | 1.900  | 21.1 | 3.2 |
| B | 2   | 0.380 | 0.211 | 0.055 | 9.593 | 0.043 | 7.900  | 21.0 | 0.7 |
| C | 3   | 0.147 | 1.073 | 0.040 | 8.877 | 0.086 | 17.000 | 19.4 | 0.5 |
| D | 4   | 0.080 | 0.486 | 0.043 | 8.510 | 0.127 | 26.500 | 18.6 | 0.2 |
| E | 5   | 0.095 | 0.663 | 0.047 | 8.619 | 0.178 | 23.500 | 18.9 | 0.2 |
| F | 5.5 | 0.084 | 0.231 | 0.042 | 8.572 | 0.199 | 25.700 | 18.8 | 0.3 |
| G | 6   | 0.084 | 0.202 | 0.045 | 8.443 | 0.085 | 25.300 | 18.5 | 0.6 |
| H | 6.5 | 0.221 | 1.179 | 0.085 | 8.617 | 0.001 | 11.700 | 18.9 | 6.2 |

IA =  $19.0 \pm 0.4$  Ma; J =  $0.0012168 \pm 0.0000064$

PA =  $18.8 \pm 0.3$  Ma (92% released gas)

IIA =  $18.1 \pm 0.6$  Ma, n = 7, MSWD = 1.3

#### Sample DCM-740A

|   |     |       |       |       |        |       |        |      |     |
|---|-----|-------|-------|-------|--------|-------|--------|------|-----|
| A | 0.5 | 3.949 | 0.014 | 0.184 | 15.643 | 0.067 | 1.300  | 33.2 | 4.5 |
| B | 1   | 5.088 | 0.007 | 0.136 | 2.425  | 0.027 | 0.200  | 5.2  | 5.6 |
| C | 1.5 | 2.707 | 0.008 | 0.088 | 8.521  | 0.034 | 1.100  | 18.2 | 4.3 |
| D | 2   | 0.884 | 0.013 | 0.054 | 6.606  | 0.039 | 2.500  | 14.1 | 1.0 |
| E | 2.5 | 0.507 | 0.012 | 0.048 | 7.131  | 0.088 | 4.500  | 15.2 | 0.7 |
| F | 3   | 0.255 | 0.011 | 0.048 | 6.934  | 0.118 | 8.400  | 14.8 | 0.3 |
| G | 3.5 | 0.205 | 0.011 | 0.044 | 7.258  | 0.134 | 10.700 | 15.5 | 0.3 |
| H | 4   | 0.225 | 0.014 | 0.046 | 7.361  | 0.168 | 10.000 | 15.7 | 0.3 |
| I | 4.5 | 0.117 | 0.015 | 0.043 | 7.160  | 0.210 | 17.100 | 15.3 | 0.1 |
| J | 5   | 0.169 | 0.014 | 0.049 | 7.051  | 0.230 | 12.400 | 15.1 | 0.3 |

IA =  $16.2 \pm 0.7$  Ma; J =  $0.0011854 \pm 0.0000062$

PA =  $15.2 \pm 0.4$  Ma (94% released gas)

IIA =  $15.43 \pm 0.36$  Ma, n = 9, MSWD = 1.3

#### Sample DCM-03A

|   |     |       |       |       |        |       |        |      |     |
|---|-----|-------|-------|-------|--------|-------|--------|------|-----|
| A | 0.5 | 0.958 | 0.023 | 0.041 | 6.311  | 0.028 | 2.200  | 12.4 | 1.3 |
| B | 1   | 0.377 | 0.030 | 0.045 | 15.852 | 0.075 | 12.500 | 31.1 | 0.9 |

|          |     |       |       |       |        |       |        |      |     |
|----------|-----|-------|-------|-------|--------|-------|--------|------|-----|
| <i>C</i> | 1.5 | 0.067 | 0.029 | 0.048 | 11.130 | 0.239 | 36.000 | 21.9 | 0.3 |
| <i>D</i> | 2   | 0.035 | 0.025 | 0.048 | 9.395  | 0.580 | 47.900 | 18.5 | 0.1 |
| <i>E</i> | 2.5 | 0.020 | 0.026 | 0.048 | 9.045  | 0.980 | 60.600 | 17.8 | 0.0 |
| <i>F</i> | 3   | 0.012 | 0.022 | 0.049 | 8.902  | 1.406 | 70.700 | 17.5 | 0.0 |
| <i>G</i> | 3.1 | 0.012 | 0.022 | 0.048 | 9.320  | 1.184 | 72.600 | 18.3 | 0.0 |
| <i>H</i> | 3.2 | 0.012 | 0.023 | 0.047 | 9.976  | 0.981 | 74.600 | 19.6 | 0.0 |

IA = 18.59±0.19 Ma; J = 0.0010943±0.0000053

IIA = 17.04 ± 0.18 Ma, n = 4, MSWD = 1.1

**Sample DCM-731A**

|          |     |       |       |       |        |       |        |      |     |
|----------|-----|-------|-------|-------|--------|-------|--------|------|-----|
| <i>A</i> | 0.5 | 5.558 | 0.162 | 0.033 | 3.142  | 0.014 | 0.200  | 6.4  | 9.9 |
| <i>B</i> | 1   | 5.566 | 0.137 | 0.069 | 13.833 | 0.020 | 0.800  | 27.9 | 8.3 |
| <i>C</i> | 1.5 | 2.862 | 0.153 | 0.103 | 11.549 | 0.033 | 1.300  | 23.4 | 2.1 |
| <i>D</i> | 2   | 1.328 | 0.165 | 0.047 | 12.237 | 0.051 | 3.000  | 24.7 | 1.3 |
| <i>E</i> | 2.5 | 0.717 | 0.157 | 0.044 | 11.314 | 0.071 | 5.100  | 22.9 | 1.2 |
| <i>F</i> | 3   | 0.392 | 0.148 | 0.048 | 11.123 | 0.093 | 8.800  | 22.5 | 0.9 |
| <i>G</i> | 3.5 | 0.222 | 0.143 | 0.048 | 10.344 | 0.119 | 13.600 | 20.9 | 0.6 |
| <i>H</i> | 4   | 0.146 | 0.142 | 0.044 | 9.890  | 0.142 | 18.700 | 20.0 | 0.2 |
| <i>I</i> | 4.5 | 0.111 | 0.151 | 0.042 | 9.497  | 0.148 | 22.400 | 19.2 | 0.2 |
| <i>J</i> | 5   | 0.105 | 0.157 | 0.045 | 9.374  | 0.167 | 23.200 | 19.0 | 0.2 |

IA = 20.0 ± 0.7 Ma; J = 0.0011258 ± 0.0000059

IIA = 17.6 ± 0.6 Ma, n = 5, MSWD = 1.2

**Sample DCA-27A**

|          |     |        |       |       |         |       |        |       |      |
|----------|-----|--------|-------|-------|---------|-------|--------|-------|------|
| <i>A</i> | 1   | 33.584 | 0.058 | 0.124 | 304.459 | 0.032 | 3.000  | 272.1 | 15.3 |
| <i>B</i> | 1.5 | 0.257  | 0.008 | 0.043 | 21.302  | 0.028 | 21.900 | 20.4  | 0.3  |
| <i>C</i> | 2   | 0.100  | 0.005 | 0.049 | 21.840  | 0.085 | 42.500 | 20.9  | 0.1  |
| <i>D</i> | 2.5 | 0.055  | 0.007 | 0.051 | 22.225  | 0.153 | 57.900 | 21.3  | 0.1  |
| <i>E</i> | 3   | 0.042  | 0.016 | 0.049 | 22.433  | 0.192 | 64.200 | 21.5  | 0.1  |
| <i>F</i> | 3.5 | 0.032  | 0.009 | 0.046 | 22.659  | 0.215 | 70.700 | 21.7  | 0.1  |
| <i>G</i> | 4   | 0.026  | 0.006 | 0.049 | 22.599  | 0.253 | 74.500 | 21.7  | 0.1  |
| <i>H</i> | 4.5 | 0.020  | 0.000 | 0.048 | 22.724  | 0.267 | 79.100 | 21.8  | 0.1  |
| <i>I</i> | 5   | 0.013  | 0.004 | 0.050 | 23.251  | 0.267 | 85.500 | 22.3  | 0.1  |
| <i>J</i> | 5.3 | 0.009  | 0.005 | 0.050 | 23.897  | 0.220 | 90.500 | 22.9  | 0.1  |
| <i>K</i> | 5.5 | 0.008  | 0.001 | 0.050 | 24.362  | 0.197 | 91.000 | 23.3  | 0.0  |

IA = 26.9 ± 0.6 Ma; J = 0.0005334 ± 0.0000032

**Sample DCA-95**

|          |     |       |       |       |        |       |        |      |     |
|----------|-----|-------|-------|-------|--------|-------|--------|------|-----|
| <i>A</i> | 1   | 2.418 | 0.015 | 0.049 | 13.771 | 0.033 | 1.900  | 30.0 | 8.4 |
| <i>B</i> | 2   | 0.392 | 0.001 | 0.042 | 6.164  | 0.110 | 5.100  | 13.5 | 1.2 |
| <i>C</i> | 2.5 | 0.102 | 0.000 | 0.043 | 9.842  | 0.171 | 24.500 | 21.5 | 0.4 |
| <i>D</i> | 3   | 0.035 | 0.000 | 0.045 | 10.697 | 0.246 | 51.000 | 23.3 | 0.2 |
| <i>E</i> | 3.5 | 0.016 | 0.000 | 0.045 | 11.568 | 0.304 | 71.600 | 25.2 | 0.1 |
| <i>F</i> | 4   | 0.008 | 0.003 | 0.045 | 12.487 | 0.385 | 84.200 | 27.2 | 0.1 |
| <i>G</i> | 4.5 | 0.005 | 0.004 | 0.044 | 13.218 | 0.470 | 90.300 | 28.8 | 0.1 |
| <i>H</i> | 5   | 0.004 | 0.003 | 0.043 | 13.274 | 0.519 | 92.500 | 28.9 | 0.1 |
| <i>I</i> | 5.5 | 0.003 | 0.004 | 0.043 | 14.090 | 0.537 | 94.000 | 30.7 | 0.0 |
| <i>J</i> | 6   | 0.009 | 0.003 | 0.043 | 16.212 | 0.148 | 86.200 | 35.3 | 0.1 |

IA = 27.5 ± 0.4 Ma; J = 0.0012145 ± 0.0000063

**Mn-oxide samples**

**Sample DCM-442**

|          |   |       |       |       |        |       |        |      |     |
|----------|---|-------|-------|-------|--------|-------|--------|------|-----|
| <i>A</i> | 2 | 0.145 | 0.073 | 0.045 | 9.991  | 0.081 | 19.000 | 10.0 | 0.1 |
| <i>B</i> | 4 | 0.022 | 0.050 | 0.046 | 11.932 | 0.199 | 65.000 | 11.9 | 0.0 |
| <i>C</i> | 6 | 0.011 | 0.048 | 0.049 | 12.150 | 0.473 | 79.000 | 12.1 | 0.0 |

|   |    |       |       |       |        |       |        |      |     |
|---|----|-------|-------|-------|--------|-------|--------|------|-----|
| D | 8  | 0.010 | 0.037 | 0.045 | 12.197 | 0.419 | 79.800 | 12.2 | 0.0 |
| E | 10 | 0.006 | 0.028 | 0.045 | 12.207 | 0.114 | 86.700 | 12.2 | 0.0 |

IA = 11.99 ± 0.15 Ma; J = 0.0005544 ± 0.0000033

PA = 12.16 ± 0.15 Ma (78% released gas)

IIA = 12.28 ± 0.28 Ma, n = 3, MSWD = 1.2

#### Sample DCM-577

|   |    |       |       |       |        |       |       |      |     |
|---|----|-------|-------|-------|--------|-------|-------|------|-----|
| A | 1  | 3.040 | 0.433 | 0.075 | 9.507  | 0.009 | 1.000 | 9.0  | 1.3 |
| B | 2  | 1.605 | 0.399 | 0.070 | 11.682 | 0.017 | 2.400 | 11.0 | 0.8 |
| C | 4  | 1.882 | 1.661 | 0.101 | 9.246  | 0.007 | 1.600 | 8.7  | 3.2 |
| D | 10 | 1.090 | 3.475 | 0.171 | 9.318  | 0.003 | 2.800 | 8.8  | 1.5 |

IA = 9.9 ± 1.6 Ma; J = 0.000524 ± 0.0000031

PA = 10.1 ± 1.7 Ma (100% released gas)

IIA = 11.3 ± 3.4 Ma, n = 4, MSWD = 1.3

#### Sample DCM-440

|   |    |       |       |       |        |       |        |      |     |
|---|----|-------|-------|-------|--------|-------|--------|------|-----|
| A | 2  | 0.587 | 0.021 | 0.051 | 3.000  | 0.018 | 1.700  | 3.1  | 1.8 |
| B | 4  | 0.284 | 0.008 | 0.045 | 6.486  | 0.038 | 7.200  | 6.7  | 0.2 |
| C | 6  | 0.108 | 0.005 | 0.046 | 10.282 | 0.049 | 24.300 | 10.6 | 0.1 |
| D | 8  | 0.011 | 0.003 | 0.045 | 10.352 | 0.098 | 76.500 | 10.6 | 0.0 |
| E | 10 | 0.003 | 0.003 | 0.047 | 10.355 | 0.280 | 92.400 | 10.7 | 0.0 |
| F | 13 | 0.002 | 0.003 | 0.043 | 10.383 | 0.639 | 95.800 | 10.7 | 0.0 |
| G | 16 | 0.001 | 0.002 | 0.043 | 10.325 | 0.341 | 96.400 | 10.6 | 0.0 |
| H | 19 | 0.001 | 0.005 | 0.043 | 10.013 | 0.059 | 96.400 | 10.3 | 0.0 |

IA = 10.45 ± 0.13 Ma; J = 0.0005705 ± 0.0000034

PA = 10.65 ± 0.13 Ma (93% released gas)

IIA = 10.66 ± 0.12 Ma, n = 5, MSWD = 1.6

#### Sample DCA-10B

|   |    |        |        |        |        |       |       |      |      |
|---|----|--------|--------|--------|--------|-------|-------|------|------|
| A | 1  | 56.257 | -1.016 | -0.362 | 7.055  | 0.001 | 0.000 | 7.2  | 38.1 |
| B | 2  | 5.264  | -0.056 | 0.093  | 10.770 | 0.007 | 0.700 | 11.0 | 2.4  |
| C | 4  | 1.877  | 0.226  | 0.043  | 9.148  | 0.032 | 1.600 | 9.4  | 0.7  |
| D | 10 | 1.022  | 0.122  | 0.071  | 9.651  | 0.076 | 3.100 | 9.9  | 0.4  |
| E | 20 | 2.862  | 0.780  | 0.240  | 9.409  | 0.014 | 1.100 | 9.7  | 2.0  |

IA = 9.8 ± 0.8 Ma; J = 0.0005688 ± 0.0000034

PA = 9.8 ± 0.8 Ma (100% released gas)

IIA = 9.8 ± 1.4 Ma, n = 5, MSWD = 0.22

#### Sample DCA-02

|   |    |       |       |       |       |       |        |      |     |
|---|----|-------|-------|-------|-------|-------|--------|------|-----|
| A | 1  | 0.704 | 0.397 | 0.047 | 5.264 | 0.010 | 2.500  | 10.2 | 1.1 |
| B | 3  | 0.211 | 0.369 | 0.049 | 7.240 | 0.049 | 10.400 | 14.0 | 0.4 |
| C | 5  | 0.015 | 0.196 | 0.042 | 7.399 | 0.074 | 62.200 | 14.3 | 0.1 |
| D | 8  | 0.002 | 0.101 | 0.045 | 7.207 | 0.317 | 91.500 | 13.9 | 0.0 |
| E | 10 | 0.001 | 0.077 | 0.042 | 7.209 | 0.643 | 96.200 | 14.0 | 0.0 |
| F | 15 | 0.001 | 0.084 | 0.043 | 7.235 | 0.196 | 94.800 | 14.0 | 0.0 |

IA = 14.0 ± 0.3 Ma; J = 0.0010744 ± 0.0000124

PA = 14.0 ± 0.3 Ma (90% released gas)

IIA = 13.92 ± 0.32 Ma, n = 4, MSWD = 1.7

#### Sample DCA-71

|   |     |       |        |       |         |       |        |        |        |
|---|-----|-------|--------|-------|---------|-------|--------|--------|--------|
| A | 1.1 | 2.563 | 10.230 | 1.536 | 207.477 | 0.000 | 21.400 | 372.60 | 177.13 |
| B | 2   | 2.972 | 1.111  | 2.048 | 25.813  | 0.000 | 2.900  | 50.76  | 16.16  |
| C | 4   | 1.437 | 3.392  | 1.530 | 17.121  | 0.001 | 3.900  | 33.83  | 12.13  |
| D | 6   | 1.157 | 3.324  | 0.941 | 12.515  | 0.001 | 3.500  | 24.79  | 7.02   |
| E | 10  | 0.671 | 3.202  | 0.394 | 12.799  | 0.003 | 6.100  | 25.35  | 2.67   |

|   |    |       |       |       |        |       |       |       |       |
|---|----|-------|-------|-------|--------|-------|-------|-------|-------|
| F | 14 | 0.362 | 4.490 | 0.216 | 9.665  | 0.009 | 8.300 | 19.17 | 1.14  |
| G | 20 | 0.534 | 6.008 | 0.148 | 12.295 | 0.001 | 7.200 | 24.35 | 10.57 |

IA =  $23.9 \pm 1.5$  Ma; J =  $0.0011028 \pm 0.0000058$

PA =  $20.5 \pm 1.9$  Ma (100% released gas)

IIA =  $15 \pm 4$  Ma, n = 6, MSWD = 0.27

#### Sample DCA-10A

|   |      |       |        |       |         |       |        |       |        |
|---|------|-------|--------|-------|---------|-------|--------|-------|--------|
| A | 3    | 1.457 | 1.850  | 0.080 | 9.341   | 0.004 | 2.100  | 9.3   | 1.5    |
| B | 6    | 1.535 | 5.595  | 0.115 | 4.583   | 0.001 | 1.000  | 4.6   | 5.8    |
| C | 10   | 1.165 | 3.233  | 0.173 | 6.988   | 0.002 | 2.000  | 7.0   | 5.5    |
| D | 12   | 1.757 | 3.648  | 0.436 | 8.940   | 0.000 | 1.700  | 8.9   | 37.1   |
| E | 18.9 | 5.529 | 78.275 | 3.565 | 739.714 | 0.000 | 30.500 | 621.4 | 1256.2 |

IA =  $9 \pm 5$  Ma; J =  $0.0005544 \pm 0.0000033$

PA =  $9 \pm 3$  Ma (100% released gas)

#### Sample DCA-01

|   |    |       |       |       |        |       |        |      |     |
|---|----|-------|-------|-------|--------|-------|--------|------|-----|
| A | 1  | 0.299 | 0.081 | 0.051 | 4.309  | 0.075 | 4.700  | 7.8  | 0.3 |
| B | 2  | 0.156 | 0.092 | 0.048 | 4.747  | 0.107 | 9.300  | 8.6  | 0.2 |
| C | 3  | 0.091 | 0.085 | 0.045 | 5.281  | 0.087 | 16.400 | 9.6  | 0.2 |
| D | 3  | 0.059 | 0.085 | 0.045 | 7.031  | 0.122 | 28.600 | 12.8 | 0.1 |
| E | 4  | 0.029 | 0.085 | 0.046 | 9.886  | 0.156 | 53.800 | 17.9 | 0.1 |
| F | 6  | 0.009 | 0.068 | 0.046 | 13.461 | 0.315 | 83.900 | 24.4 | 0.0 |
| G | 8  | 0.002 | 0.061 | 0.044 | 13.358 | 0.860 | 95.800 | 24.2 | 0.0 |
| H | 11 | 0.001 | 0.070 | 0.045 | 9.966  | 2.318 | 97.700 | 18.1 | 0.0 |
| I | 16 | 0.001 | 0.073 | 0.045 | 8.632  | 4.997 | 98.300 | 15.7 | 0.0 |
| J | 18 | 0.001 | 0.052 | 0.044 | 14.546 | 0.533 | 97.800 | 26.3 | 0.0 |
| K | 25 | 0.001 | 0.031 | 0.045 | 21.859 | 0.085 | 99.000 | 39.4 | 0.2 |

IA =  $17.8 \pm 0.4$  Ma; J =  $0.0010446 \pm 0.000012$

#### Sample DCA-08

|   |    |       |       |       |       |       |        |     |     |
|---|----|-------|-------|-------|-------|-------|--------|-----|-----|
| A | 1  | 0.607 | 0.005 | 0.038 | 1.747 | 0.015 | 1.000  | 3.3 | 1.7 |
| B | 2  | 0.268 | 0.021 | 0.043 | 3.781 | 0.038 | 4.500  | 7.1 | 0.5 |
| C | 4  | 0.019 | 0.018 | 0.045 | 3.414 | 0.069 | 38.300 | 6.4 | 0.1 |
| D | 6  | 0.003 | 0.015 | 0.044 | 2.321 | 0.090 | 70.100 | 4.4 | 0.0 |
| E | 8  | 0.001 | 0.021 | 0.045 | 2.517 | 0.455 | 90.700 | 4.7 | 0.0 |
| F | 10 | 0.001 | 0.016 | 0.044 | 3.281 | 1.240 | 95.200 | 6.2 | 0.0 |
| G | 15 | 0.001 | 0.016 | 0.046 | 3.983 | 1.227 | 95.100 | 7.5 | 0.0 |
| H | 20 | 0.057 | 0.248 | 0.046 | 0.126 | 0.003 | 0.700  | 0.2 | 1.8 |

IA =  $6.44 \pm 0.15$  Ma; J =  $0.0010075 \pm 0.0000116$

#### Sample DCM-447

|   |    |       |       |       |        |       |        |      |     |
|---|----|-------|-------|-------|--------|-------|--------|------|-----|
| A | 1  | 0.025 | 0.083 | 0.043 | 7.946  | 0.030 | 51.600 | 15.4 | 0.2 |
| B | 3  | 0.030 | 0.088 | 0.045 | 8.033  | 0.117 | 47.700 | 15.6 | 0.1 |
| C | 5  | 0.001 | 0.098 | 0.044 | 7.258  | 0.281 | 95.200 | 14.1 | 0.0 |
| D | 8  | 0.001 | 0.077 | 0.045 | 9.779  | 0.791 | 97.600 | 18.9 | 0.0 |
| E | 9  | 0.001 | 0.047 | 0.045 | 10.177 | 0.948 | 98.500 | 19.7 | 0.0 |
| F | 10 | 0.001 | 0.057 | 0.045 | 9.215  | 0.174 | 98.200 | 17.9 | 0.0 |
| G | 15 | 0.000 | 0.074 | 0.043 | 7.391  | 0.029 | 99.300 | 14.3 | 0.2 |

IA =  $18.3 \pm 0.4$  Ma; J =  $0.0010768 \pm 0.0000124$

---
